# Supplementary material
Source: PubMed Central journal article supplement (PMC2766283)
Supplement: NIHMS143242-supplement-supplmentary_math_details.pdf [file NIHMS143242-supplement-supplmentary_math_details.pdf]

On Estimation of Vaccine Efficacy  
Using Validation Samples with Selection Bias:  
Supplementary Material

DANIEL O. SCHARFSTEIN<sup>1</sup>, M. ELIZABETH HALLORAN<sup>2</sup>,  
HAITAO CHU<sup>3</sup>, MICHAEL J. DANIELS<sup>4</sup>

<sup>1</sup> *Department of Biostatistics,  
Johns Hopkins Bloomberg School of Public Health, Baltimore MD 21205 USA*  
dscharf@jhsph.edu, phone: 410-955-2420, fax: 410-955-0958

<sup>2</sup> *Program in Biostatistics and Biomathematics, Fred Hutchinson Cancer Research Center  
Seattle, WA 98109 USA*

<sup>2</sup> *Department of Biostatistics, University of Washington.  
Seattle, WA 98195 USA*

<sup>3</sup> *Department of Epidemiology,  
Johns Hopkins Bloomberg School of Public Health, Baltimore MD 21205 USA*

<sup>4</sup> *Department of Statistics,  
University of Florida, Gainesville, FL 32611 USA*

February 28, 2006

## A Large Sample Theory

Let

$$W_{z,x,y}(O) = I(Z = z, X = x, A = 1, R = 1, Y = y)$$

$$\omega_{z,x,y} = P[Z = z, X = x, A = 1, R = 1, Y = y]$$

$$V_{z,x,a}(O) = I(Z = z, X = x, A = a)$$

$$\nu_{z,x,a}(O) = P[Z = z, X = x, A = a]$$

and

$$W(O) = (W_{0,0,0}(O), W_{0,0,1}(O), W_{1,0,0}(O), W_{1,0,1}(O), W_{0,1,0}(O), W_{0,1,1}(O), W_{1,1,0}(O), W_{1,1,1}(O), \\ W_{0,2,0}(O), W_{0,2,1}(O), W_{1,2,0}(O), W_{1,2,1}(O))'$$

$$V(O) = (V_{0,0,0}(O), V_{0,0,1}(O), V_{1,0,0}(O), V_{1,0,1}(O), V_{0,1,0}(O), V_{0,1,1}(O), V_{1,1,0}(O), V_{1,1,1}(O),$$

$$\begin{aligned}
& V_{0,2,0}(O), V_{0,2,1}(O), V_{1,2,0}(O), V_{1,2,1}(O))' \\
U(0) &= (W(0)', V(0)')' \\
\omega &= (\omega_{0,0,0}, \omega_{0,0,1}, \omega_{1,0,0}, \omega_{1,0,1}, \omega_{0,1,0}, \omega_{0,1,1}, \omega_{1,1,0}, \omega_{1,1,1}, \omega_{0,2,0}, \omega_{0,2,1}, \omega_{1,2,0}, \omega_{1,2,1})' \\
\nu &= (\nu_{0,0,0}, \nu_{0,0,1}, \nu_{1,0,0}, \nu_{1,0,1}, \nu_{0,1,0}, \nu_{0,1,1}, \nu_{1,1,0}, \nu_{1,1,1}, \nu_{0,2,0}, \nu_{0,2,1}, \nu_{1,2,0}, \nu_{1,2,1})' \\
\mu &= (\omega', \nu')'
\end{aligned}$$

By the multivariate central limit theorem, we know that

$$\frac{1}{\sqrt{n}} \sum_{i=1}^n \{U(O_i) - \mu\} = \sqrt{n}(\tilde{\mu} - \mu) \xrightarrow{D} N_{24}(0, \Sigma)$$

where  $\Sigma = E[(U(O) - \mu)(U(O) - \mu)']$  and  $\tilde{\mu}$  has components

$$\begin{aligned}
\tilde{\omega}_{z,x,y} &= \tilde{P}[Z = z, X = x, A = 1, R = 1, Y = y] \\
\tilde{\nu}_{z,x,a} &= \tilde{P}[Z = z, X = x, A = a]
\end{aligned}$$

The asymptotic variance can be estimated  $\hat{\Sigma} = \tilde{E}[(U(O_i) - \tilde{\mu})(U(O_i) - \tilde{\mu})']$ , where  $\tilde{E}[\cdot]$  is the empirical expectation operator.

For fixed  $\beta_{z,x}$ 's, we see that

$$\begin{aligned}
VE_{S,x} &= 1 - \exp(f_x(\mu)) \\
\hat{V}E_{S,x} &= 1 - \exp(f_x(\tilde{\mu})) \\
VE_S &= 1 - \exp(g(\mu)) \\
\hat{V}E_S &= 1 - \exp(g(\tilde{\mu}))
\end{aligned}$$

where

$$\begin{aligned}
f_x(\mu) &= \log(\omega_{1,x,1}) + \log(\nu_{1,x,1}) - \log(\nu_{1,x,1} + \nu_{1,x,0}) - \log(\beta_{1,x}\omega_{1,x,0} + \omega_{1,x,1}) - \\
&\quad \log(\omega_{0,x,1}) - \log(\nu_{0,x,1}) + \log(\nu_{0,x,1} + \nu_{0,x,0}) + \log(\beta_{0,x}\omega_{0,x,0} + \omega_{0,x,1}) \\
g(\mu) &= \log \left( \sum_{x=0}^2 \left\{ \frac{\omega_{1,x,1} \frac{\nu_{1,x,1}}{\nu_{1,x,1} + \nu_{1,x,0}}}{\beta_{1,x}\omega_{1,x,0} + \omega_{1,x,1}} \left( \sum_{z=0}^1 \sum_{a=0}^1 \nu_{z,x,a} \right) \right\} \right) - \\
&\quad \log \left( \sum_{x=0}^2 \left\{ \frac{\omega_{0,x,1} \frac{\nu_{0,x,1}}{\nu_{0,x,1} + \nu_{0,x,0}}}{\beta_{0,x}\omega_{0,x,0} + \omega_{0,x,1}} \left( \sum_{z=0}^1 \sum_{a=0}^1 \nu_{z,x,a} \right) \right\} \right)
\end{aligned}$$

By the multivariate delta method, we can now derive the asymptotic distribution of  $f_x(\tilde{\mu})$  and  $g(\tilde{\mu})$ , which we then use to construct confidence intervals for  $VE_{S,x}$  and  $VE_S$  using the  $1 - \exp(\cdot)$  function. In particular, we know that  $f_x(\tilde{\mu}) - f_x(\mu) \approx N(0, \hat{\sigma}_{f_x}^2)$  and  $g(\tilde{\mu}) - g(\mu) \approx N(0, \hat{\sigma}_g^2)$ ,

where

$$\begin{aligned}\hat{\sigma}_{f_x}^2 &= \frac{1}{n} \nabla f_x(\tilde{\mu})' \hat{\Sigma} \nabla f_x(\tilde{\mu}) \\ \hat{\sigma}_g^2 &= \frac{1}{n} \nabla g(\tilde{\mu})' \hat{\Sigma} \nabla g(\tilde{\mu})\end{aligned}$$

and  $\nabla f_x(\mu)$  and  $\nabla g(\mu)$  are the partial derivative matrices (with respect to  $\mu$ ) of the functions  $f_x(\cdot)$  and  $g(\cdot)$ , respectively.

So, 95% confidence intervals for  $VE_{S,x}$  and  $V_S$  are given by

$$\begin{aligned}[1 - \exp(f_x(\tilde{\mu}) + 1.96\hat{\sigma}_{f_x}), 1 - \exp(f_x(\tilde{\mu}) - 1.96\hat{\sigma}_{f_x})] \\ [1 - \exp(g(\tilde{\mu}) + 1.96\hat{\sigma}_g), 1 - \exp(g(\tilde{\mu}) - 1.96\hat{\sigma}_g)],\end{aligned}$$

respectively.

## B Sampling from the posterior distribution

We consider the complete data as  $\mathcal{F} = \{F_i = (Z_i, X_i, A_i, R_i, Y_i : A_i = 1) : i = 1, \dots, n\}$ . In the full data, there is no missing data on true influenza for those who have MAARI. Let  $\mathcal{F} - \mathcal{O}$  denote the missing data. In the sampling from the posterior distribution, we use data augmentation (Tanner and Wong, 1987). Specifically, we will augment the posterior by  $\mathcal{F} - \mathcal{O}$  and a vector of positive latent variables  $\mathbf{u}$  with independent components  $u_{z,x}$  (Damien *et al.* 1999). We will seek to compute the posterior,

$$\pi(\mathbf{u}, \beta, \eta, \mathbf{p}, \phi, \mathcal{F} - \mathcal{O} | \mathcal{O}) = \pi(\mathbf{u}, \beta, \eta, \mathbf{p}, \phi | \mathcal{F}) \pi(\mathcal{F} - \mathcal{O} | \mathcal{O}),$$

where

$$\begin{aligned}\pi(\mathbf{u}, \beta, \eta, \mathbf{p}, \phi | \mathcal{F}) &\propto \mathcal{L}(\mathbf{u}, \beta, \eta; \mathcal{F}) \mathcal{L}(\mathbf{p}; \mathcal{F}) \mathcal{L}(\phi; \mathcal{F}) \pi(\beta) \pi(\eta | \beta) \pi(\mathbf{p}) \pi(\phi) \\ u_{z,x}^*(\beta_{z,x}, \eta_{z,x}; \mathcal{F}) &= \left\{ \left\{ \beta_{z,x} \eta_{z,x} \right\}^{\sum_{i \in S_{z,x}} A_i R_i Y_i} \left\{ 1 - \beta_{z,x} \eta_{z,x} \right\}^{\sum_{i \in S_{z,x}} A_i (1-R_i) Y_i} I(0 \leq \beta_{z,x} \eta_{z,x} \leq 1) \right\} \\ \mathcal{L}(\mathbf{u}, \beta, \eta; \mathcal{F}) &= \prod_{z=0}^1 \prod_{x=0}^2 \left\{ I(u_{z,x} \leq u_{z,x}^*(\beta_{z,x}, \eta_{z,x}; \mathcal{F})) \left\{ \eta_{z,x} \right\}^{\sum_{i \in S_{z,x}} A_i R_i (1-Y_i)} \left\{ 1 - \eta_{z,x} \right\}^{\sum_{i \in S_{z,x}} A_i (1-R_i) (1-Y_i)} \right. \\ &\quad \left. I(0 \leq \eta_{z,x} \leq \min\{1/\beta_{z,x}, 1\}) \right\} \\ \mathcal{L}(\mathbf{p}; \mathcal{F}) &= \prod_{z=0}^1 \prod_{x=0}^2 \left\{ \left\{ p_{z,x} \right\}^{\sum_{i \in S_{z,x}} A_i Y_i} \left\{ 1 - p_{z,x} \right\}^{\sum_{i \in S_{z,x}} A_i (1-Y_i)} I(0 \leq p_{z,x} \leq 1) \right\} \\ \mathcal{L}(\phi; \mathcal{F}) &= \prod_{z=0}^1 \left\{ \left\{ \prod_{x=0}^2 \left\{ \phi_{z,x,1} \right\}^{\sum_{i \in S_{z,x}} A_i} \left\{ \phi_{z,x,0} \right\}^{\sum_{i \in S_{z,x}} (1-A_i)} I(0 \leq \phi_{z,x,1}, \phi_{z,x,0} \leq 1) \right\} \right. \\ &\quad \left. I\left(\sum_{x=0}^2 \sum_{a=0}^1 \phi_{z,x,a} = 1\right) \right\}\end{aligned}\tag{1}$$

and  $\mathcal{S}_{z,x} = \{i : Z_i = z, X_i = x\}$ . We will obtain the posterior  $\pi(\boldsymbol{\beta}, \boldsymbol{\eta}, \mathbf{p}, \boldsymbol{\phi} | \mathcal{O})$  by integrating out  $\mathcal{F} - \mathcal{O}$  and  $\mathbf{u}$  (via Monte Carlo integration within the sampling algorithm).

To sample from  $\pi(\mathbf{u}, \boldsymbol{\beta}, \boldsymbol{\eta}, \mathbf{p}, \boldsymbol{\phi}, \mathcal{F} - \mathcal{O} | \mathcal{O})$ , we sequentially sample from all of the full conditionals as follows:

1.  $\pi(\mathbf{p} | \mathbf{u}, \boldsymbol{\beta}, \boldsymbol{\eta}, \boldsymbol{\phi}, \mathcal{F}) = \pi(\mathbf{p} | \mathcal{F})$

The distribution of  $\mathbf{p}$  given  $\mathcal{F}$  can be shown to have independent components where

$$p_{z,x} | \mathcal{F} \sim \text{Beta} \left( \sum_{i \in \mathcal{S}_{z,x}} A_i Y_i + 1, \sum_{i \in \mathcal{S}_{z,x}} A_i (1 - Y_i) + 1 \right)$$

2.  $\pi(\mathcal{F} - \mathcal{O} | \mathbf{u}, \boldsymbol{\beta}, \boldsymbol{\eta}, \mathbf{p}, \boldsymbol{\phi}, \mathcal{O})$

For the set of individuals in stratum  $\mathcal{S}_{z,x}$  with  $R_i = 0$  and  $A_i = 1$ , we draw  $S_{z,x}^\dagger = \{Y_i : R_i = 0, A_i = 1, Z_i = z, X_i = x\}$  from a binomial distribution with success probability

$$\frac{p_{z,x}}{p_{z,x} + (1 - p_{z,x})(1 - \eta_{z,x})}$$

truncated from above by the condition  $u_{z,x} < u_{z,x}^*(\beta_{z,x}, \eta_{z,x}; (\mathcal{O}, S_{z,x}^\dagger))$ .

3.  $\pi(\mathbf{u} | \boldsymbol{\beta}, \boldsymbol{\eta}, \mathbf{p}, \boldsymbol{\phi}, \mathcal{F}) = \prod_{z=0}^1 \prod_{x=0}^2 \pi(u_{z,x} | \boldsymbol{\beta}, \boldsymbol{\eta}, \mathcal{F})$

For each  $z, x$  stratum,  $\pi(u_{z,x} | \boldsymbol{\beta}, \boldsymbol{\eta}, \mathcal{F})$  is uniform on the interval  $(0, u_{z,x}^*(\beta_{z,x}, \eta_{z,x}, \mathcal{F}))$ .

4.  $\pi(\boldsymbol{\eta}, \boldsymbol{\beta} | \mathbf{u}, \mathbf{p}, \boldsymbol{\phi}, \mathcal{F}) \equiv \pi(\boldsymbol{\eta}, \boldsymbol{\beta} | \mathbf{u}, \mathcal{F})$

We will use slice sampling (Neal, 2003) to sample from the full conditional distribution of  $(\boldsymbol{\beta}, \boldsymbol{\eta})$ . Given the form of (1), we will sample from a truncated form of  $\pi(\boldsymbol{\beta})$  and a truncated  $\text{Beta}(\sum_{i \in \mathcal{S}_{z,x}} A_i R_i (1 - Y_i) + 1, \sum_{i \in \mathcal{S}_{z,x}} A_i (1 - R_i) (1 - Y_i) + 1)$  for  $\eta_{z,x}$ . The truncation bounds cannot be entirely expressed in closed form. We now describe how to obtain them sequentially.

We want to sample the  $(\beta_{z,x}, \eta_{z,x})$  in pairs, but  $\pi(\boldsymbol{\beta}) \neq \prod_{z=0}^1 \prod_{x=0}^2 \pi(\beta_{z,x})$ . To deal with this, we factor  $\pi(\boldsymbol{\beta})$  as  $\prod_{z=0}^1 \prod_{x=0}^2 \pi^*(\beta_{z,x})$  where

$$\pi^*(\beta_{z,x}) = \pi(\beta_{z,x} | \{\beta_{z^*,x^*} : z^* = z, x^* < x \text{ and } z^* < z\})$$

and  $\pi^*(\beta_{0,0}) = \pi(\beta_{0,0})$ . Then, in that order, we sample the pairs  $(\beta_{z,x}, \eta_{z,x})$ . To sample  $\beta_{z,x}$ , we note that  $\pi^*(\beta_{z,x})$  is truncated by the condition  $I(u_{z,x} < u_{z,x}^*(\gamma_{z,x}; \mathcal{F}))$ , where  $u_{z,x}^*(\gamma_{z,x}; \mathcal{F}) = u^*(\beta_{z,x}, \eta_{z,x}; \mathcal{F})$  with  $\gamma_{z,x} = \beta_{z,x} \eta_{z,x}$ . Let

$$\hat{\gamma}_{z,x} = \frac{\sum_{i \in \mathcal{S}_{z,x}} A_i R_i Y_i}{\sum_{i \in \mathcal{S}_{z,x}} A_i Y_i}$$

denote the maximum likelihood estimate of  $u^*(\gamma_{z,x}; \mathcal{F})$ . Note that  $u_{z,x} \leq u^*(\hat{\gamma}_{z,x}; \mathcal{F})$ .

Since we sample  $\beta_{z,x}$  before  $\eta_{z,x}$ , we need to make sure we sample  $\beta_{z,x}$  such that there are values of  $\eta_{z,x}$  which will satisfy this condition. If  $0 < \hat{\gamma}_{z,x} \leq 1$ , then  $\beta_{z,x}$  can lie in the interval  $(\beta_{z,x}^*, \infty)$ , where  $\beta_{z,x}^*$  is equal to the unique  $\gamma_{z,x}^L$  satisfying  $u^*(\gamma_{z,x}^L; \mathcal{F}) = u_{z,x}$  and  $\gamma_{z,x}^L \leq \hat{\gamma}_{z,x}$ . Since  $u^*(\gamma_{z,x}; \mathcal{F})$  is monotone in  $\gamma_{z,x}$  for  $0 < \gamma_{z,x} \leq \hat{\gamma}_{z,x}$ ,  $\beta_{z,x}^*$  can be found by performing a bi-section search for the equality condition on the interval  $(0, \hat{\gamma}_{z,x}]$ . If  $\hat{\gamma}_{z,x} = 0$ , then  $\beta_{z,x}$  can lie in  $(0, \infty)$ .

For  $\eta_{z,x}$  given  $\beta_{z,x}$ , we sample from a truncated Beta distribution with parameters as specified above. For  $0 \leq \hat{\gamma}_{z,x} < 1$ , define  $\gamma_{z,x}^U$  to be the unique quantity satisfying  $u^*(\gamma_{z,x}^U; \mathcal{F}) = u_{z,x}$  and  $\gamma_{z,x}^U > \hat{\gamma}_{z,x}$ . If  $0 < \hat{\gamma}_{z,x} < 1$ ,  $\eta_{z,x}$  must lie in the interval  $\left[\frac{\gamma_{z,x}^L}{\beta_{z,x}}, \min\left(\frac{\gamma_{z,x}^U}{\beta_{z,x}}, 1\right)\right]$ . If  $\hat{\gamma}_{z,x} = 0$ ,  $\eta_{z,x}$  must lie in the interval  $\left[0, \min\left(\frac{\gamma_{z,x}^U}{\beta_{z,x}}, 1\right)\right]$ . If  $\hat{\gamma}_{z,x} = 1$ ,  $\eta_{z,x}$  must lie in the interval  $\left[\min\left(\frac{\gamma_{z,x}^L}{\beta_{z,x}}, 1\right), 1\right]$ .

5.  $\pi(\boldsymbol{\phi} | \mathbf{u}, \boldsymbol{\beta}, \boldsymbol{\beta}, \mathbf{p}, \mathcal{F}) = \prod_{z=0}^1 \pi(\boldsymbol{\phi}_z | \mathcal{F})$

Given  $\mathcal{F}$ , sample  $\boldsymbol{\phi}_z$  from a Dirichlet distribution with parameters  $((1+n_{z1}, 1+n_{z2}, \dots, 1+n_{zK}))$ .

6. Compute  $VE_{S,x}$  and  $VE_S$  using Equations (11) and (12) from the main manuscript, respectively.

Repeat steps 1-6  $K$  times, discarding an appropriate number of samples from the burn-in period. Obtain the posterior mean, median, mode, and  $1 - \alpha$  HPD credible set or  $1 - \alpha$  equal tail credible set of  $VE_{S,x}$  and  $VE_S$  from the Monte Carlo samples.

To perform Bayesian analysis with fix  $\boldsymbol{\beta}$ , we sample  $\eta_{z,x}$  as described in Step 4. given the fixed value of  $\boldsymbol{\beta}$ .
